# Supplementary material for: Denitrification, dehydration and ozone loss during the Arctic winter 2015/2016
Source: Copernicus journal article supplement (doi:10.5194/acp-2017-503), 2017-06-08
Supplement: Supplementary file [file acp-2017-503-AC2-supplement.pdf]

## Reply to Referee 2 Comments

Manuscript-No: acp-2017-503

Denitrification, dehydration and ozone loss during the Arctic winter 2015/2016

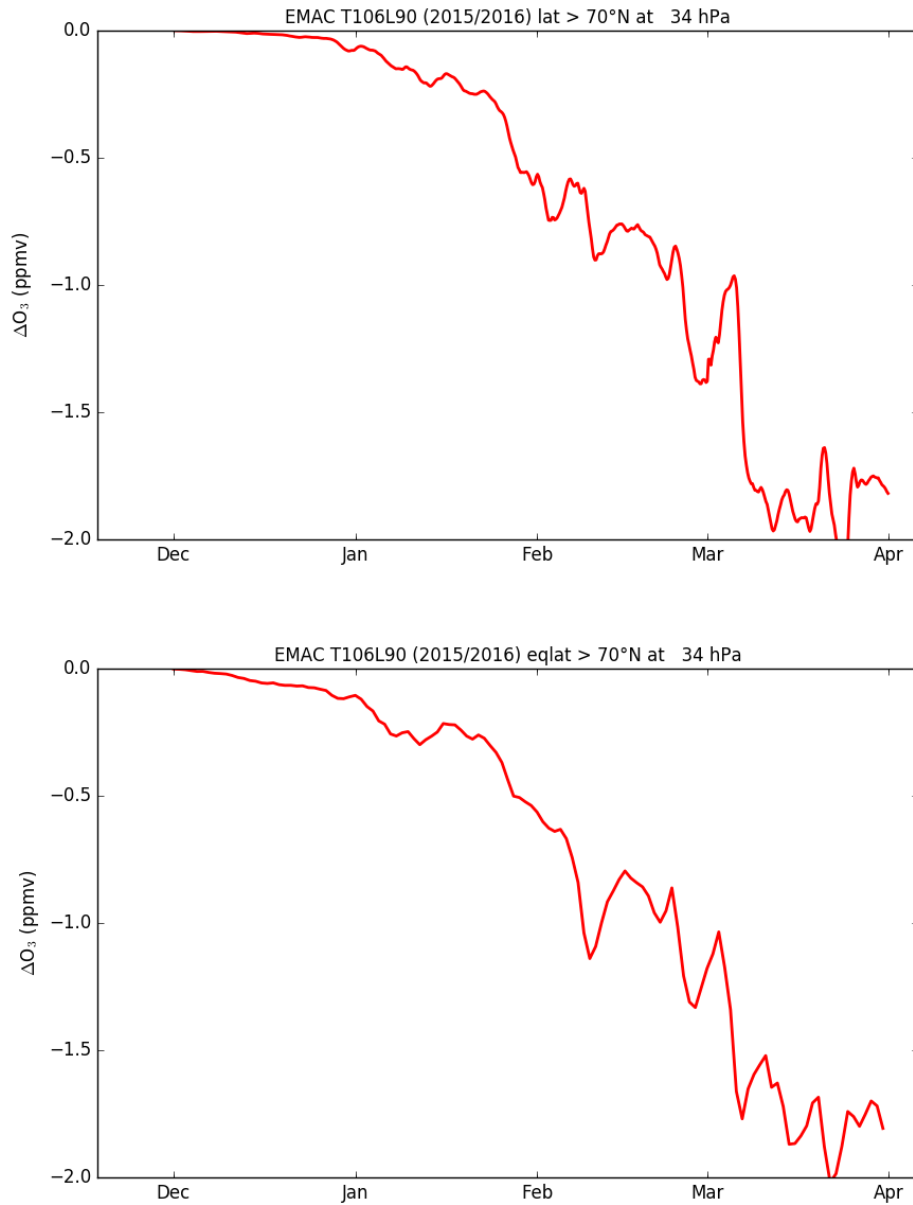

Figure 1: Ozone loss from EMAC T106L90 simulation at 34 hPa for the Arctic winter 2015/2016. Ozone loss has been derived from the difference between the active tracer  $O_3$  and the passive tracer  $O_3^*$  ( $\Delta O_3 = O_3 - O_3^*$ ). Top: average over 70-90°N latitude, bottom: average over 70-90°N equivalent latitude.

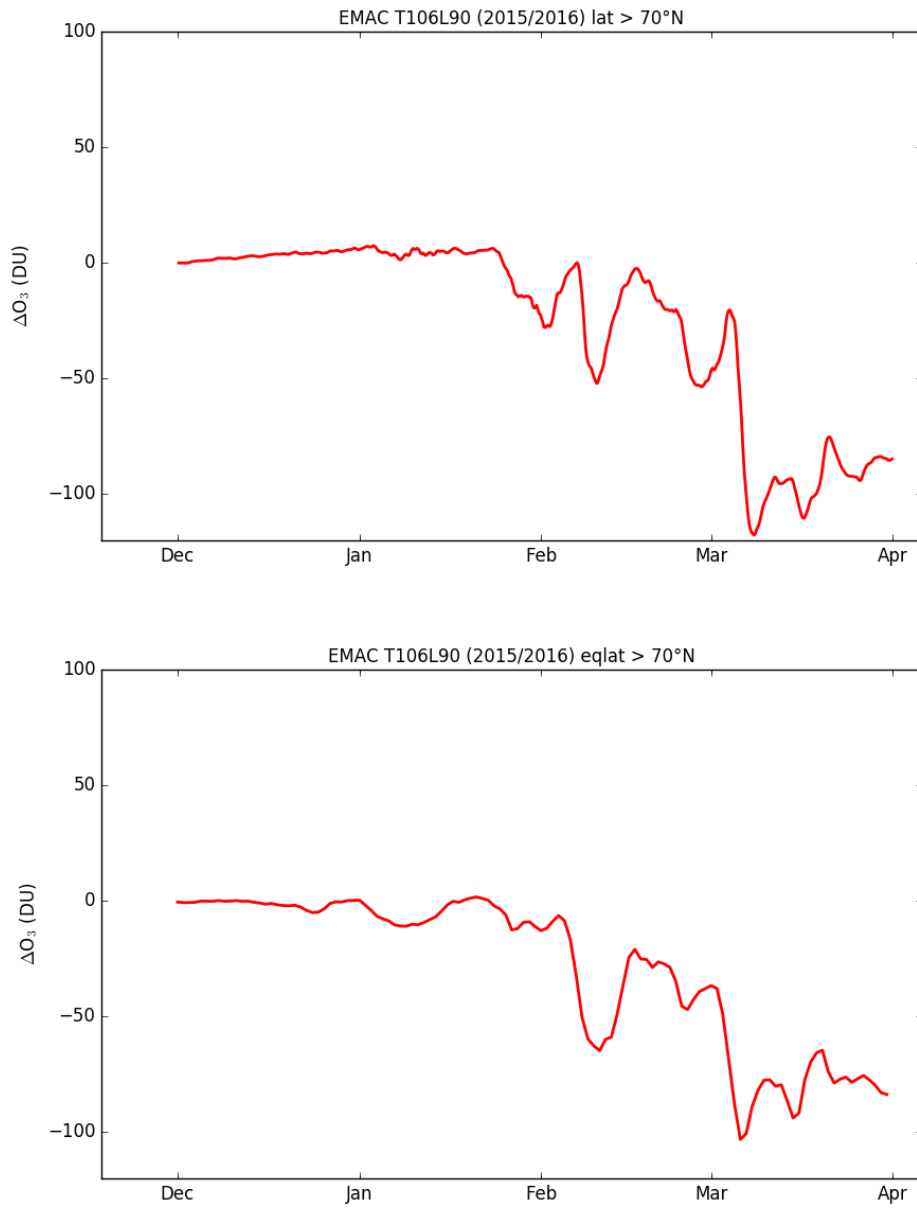

Figure 2: Total column ozone loss derived from the EMAC T106L90 simulation. Ozone loss has been derived from the difference between the active tracer  $O_3$  at the passive tracer  $O_3^*$  ( $\Delta O_3 = O_3 - O_3^*$ ). Top: average over 70-90°N latitude, bottom: average over 70-90°N equivalent latitude.

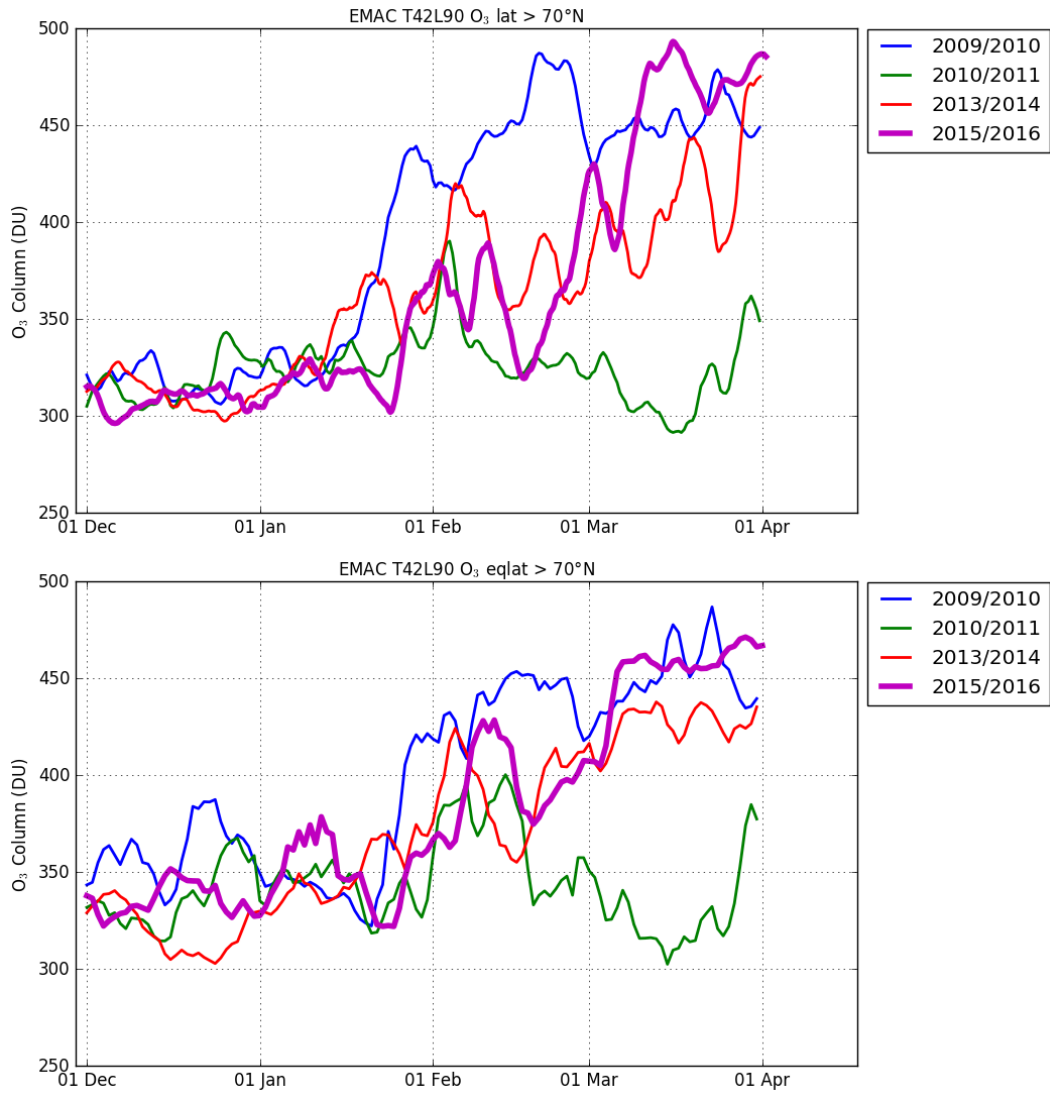

Figure 3: Ozone column time series for the Arctic winters 2009/2010 (blue), 2010/2011 (green), 2013/2014 (red) and 2015/2016 (magenta) averaged over 60-90°N latitude (top) and 60-90°N equivalent latitude (bottom). Results from the EMAC T42L90 simulation are shown.
